# Supplementary material
Source: MDPI journal article supplement (https://www.mdpi.com/2227-9040/7/2/21)
Supplement: s1 [file s1]

Supplementary Data

# Optical Detection of Bromide Ions Using Pt(II)-5,10,15,20-Tetra-(4-methoxy-phenyl)-porphyrin

Anca Lascu <sup>1</sup>, Nicoleta Plesu <sup>1</sup>, Diana Anghel <sup>1</sup>, Mihaela Birdeanu <sup>2</sup>, Dana Vlascici <sup>3</sup> and Eugenia Fagadar-Cosma <sup>1,\*</sup>

<sup>1</sup> Institute of Chemistry “Coriolan Dragulescu”, Mihai Viteazu Ave. No. 24, 300223 Timisoara, Romania; alascu@acad-icht.tm.edu.ro (A.L.); nplesu@acad-icht.tm.edu.ro (N.P.); danghel@acad-icht.tm.edu.ro (D.A.)

<sup>2</sup> National Institute for Research and Development in Electrochemistry and Condensed Matter, P. Andronescu Street, No. 1, 300224 Timisoara, Romania; mihaelabirdeanu@gmail.com

<sup>3</sup> Faculty of Chemistry, Biology, Geography, West University of Timisoara, 4 V. Parvan Ave, 300223 Timisoara, Timis, Romania; dana.vlascici@e-uvt.ro

\* Correspondence: efagadarcosma@acad-icht.tm.edu.ro or efagadar@yahoo.com; Tel.: +40-256-491-818

Received: 29 March 2019; Accepted: 23 April 2019; Published: date

## Investigation of the Stability of PtTMeOPP Solution in THF in Different pH Media

### 3.1.1. Acidic Media

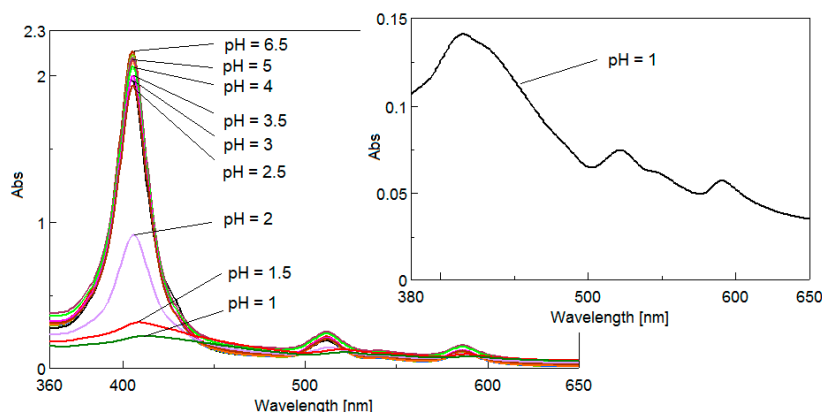

**Figure S1.** Overlapped UV-vis spectra after successive adding of 0.5 N HCl solution to PtTMeOPP solution in THF. Detail: Spectrum for the solution at pH = 1.

### 3.1.2. Basic Media

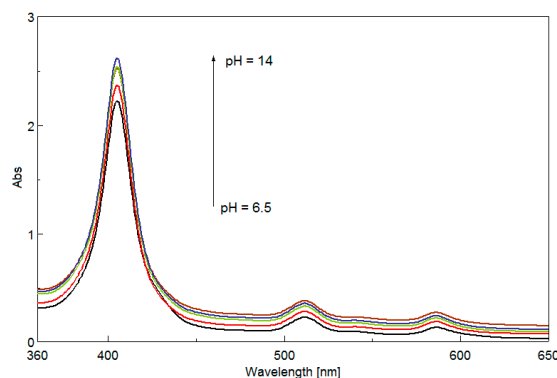

**Figure S2.** Overlapped UV-vis spectra after increasing the basicity of the PtTMeOPP solution in THF.

### 3.1.3. Phosphate Buffered Solution

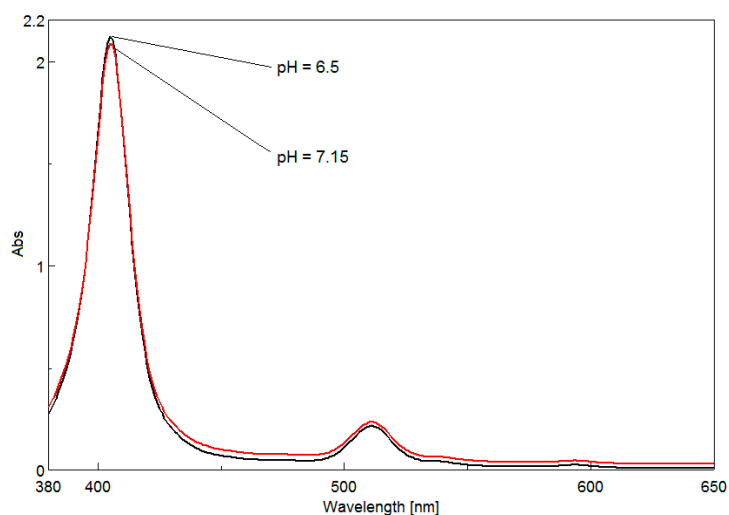

**Figure S3.** The influence of phosphate buffer solution on the shape and intensity of the PtTMeOPP UV-vis spectrum.

*AFM Studies Concerning the Aggregation Properties of Pttmeopp at The Interface of Different Solvents/Air on Silica Plates*

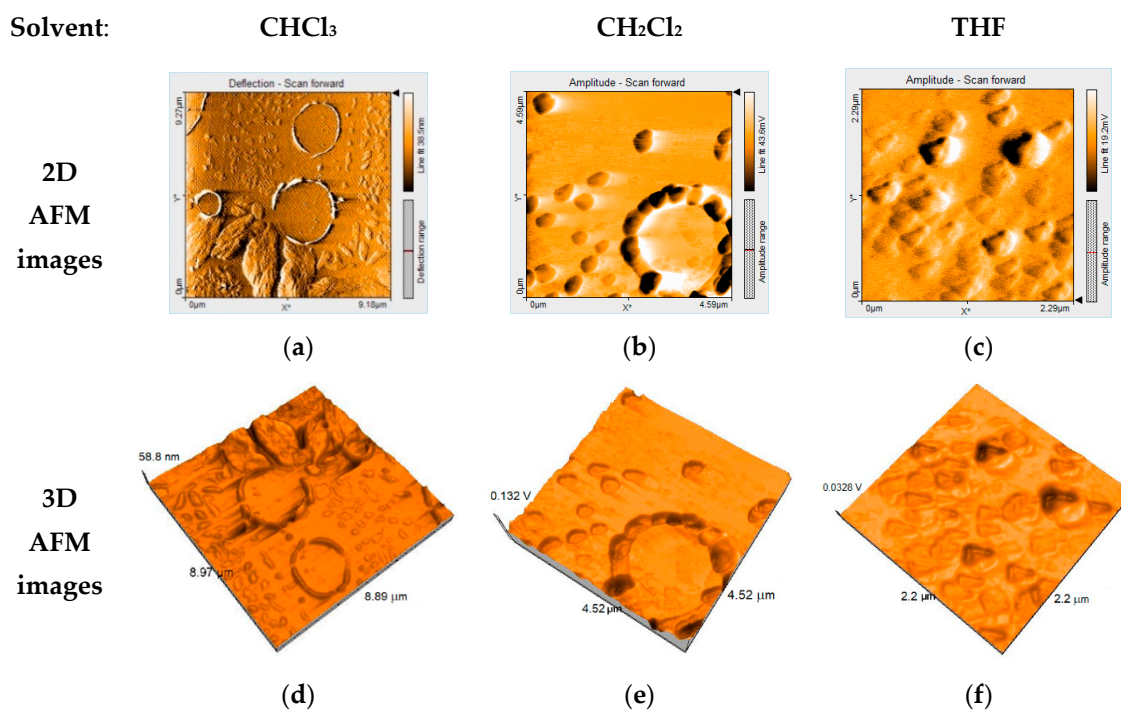

**Figure S4.** AFM images of PtTMeOPP deposited from different solvents by drop-casting.

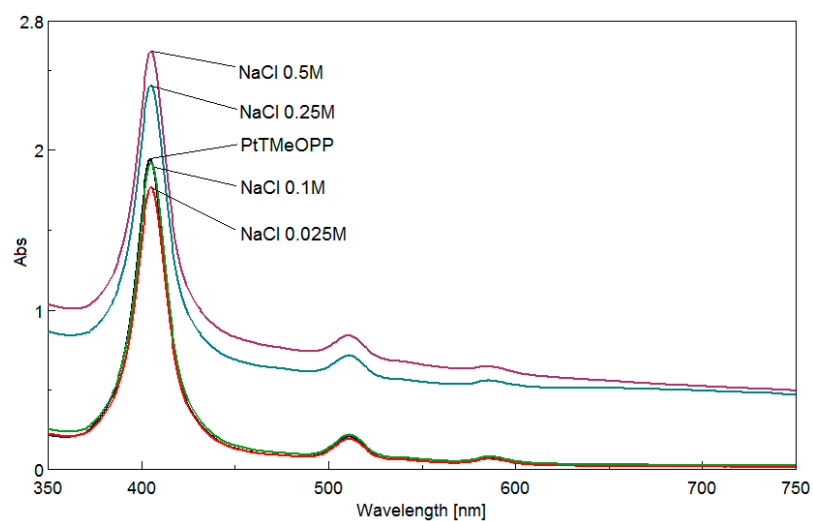

**Figure S5.** Influence of the ionic strength upon the UV-vis spectrum of PtTMeOPP in THF solution.
